# Supplementary material
Source: Research Square preprint supplement (doi:10.21203/rs.3.rs-9459936/v1)

**An Eco-Friendly Protocol for Amide Production: Employing  
Kaolin/Dextrin/Zinc as a Heterogeneous Catalyst**

*Ali Akbar Fazli-Shahri, Seyed Ali Mousavi-Mashhadi, Ali Shiri\**

*Department of Chemistry, Faculty of Science, Ferdowsi University of Mashhad,*

*Mashhad, Iran.*

*\*Corresponding Author E-mail: [alishiri@um.ac.ir](mailto:alishiri@um.ac.ir)*

## Table of contents

| Content                                                   | Page |
|-----------------------------------------------------------|------|
| Mass spectroscopy of compound (1)                         | 3    |
| <sup>1</sup> H NMR spectrum of compound (1)               | 4    |
| <sup>13</sup> C NMR spectrum of compound (1)              | 5    |
| Mass spectroscopy of compound (2)                         | 6    |
| <sup>1</sup> H NMR spectrum of compound (2)               | 7    |
| <sup>13</sup> C NMR spectrum of compound (2)              | 8    |
| Mass spectroscopy of compound (3)                         | 9    |
| <sup>1</sup> H NMR spectrum of compound (3)               | 10   |
| <sup>13</sup> C NMR spectrum of compound (3)              | 11   |
| Mass spectroscopy of compound (4)                         | 12   |
| <sup>1</sup> H NMR spectrum of compound (4)               | 13   |
| <sup>13</sup> C NMR spectrum of compound (4)              | 14   |
| Mass spectroscopy of compound (5)                         | 15   |
| <sup>1</sup> H NMR spectrum of compound (5)               | 16   |
| <sup>13</sup> C NMR spectrum of compound (5)              | 17   |
| Mass spectroscopy of compound (14)                        | 18   |
| <sup>1</sup> H NMR spectrum of compound (14)              | 19   |
| <sup>13</sup> C NMR spectrum of compound (14)             | 20   |
| FT-IR spectrum of kaolin/dextrin and kaolin/dextrin/zinc. | 21   |
| EDX spectroscopy for kaolin/dextrin/zinc catalyst.        | 22   |
| SEM for kaolin/dextrin/zinc.                              | 23   |
| TEM for kaolin/dextrin/zinc.                              | 24   |
| XRD spectroscopy for kaolin/dextrin/zinc.                 | 25   |
| TGA of kaolin/dextrin/zinc.                               | 26   |

# Mass spectroscopy of compound (1)

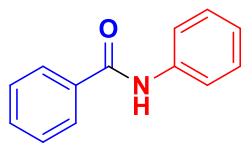

Chem. Dep., Sciences Faculty, Ferdowsi Univ., Mashhad, IRAN  
Mass Spectroscopy Laboratory

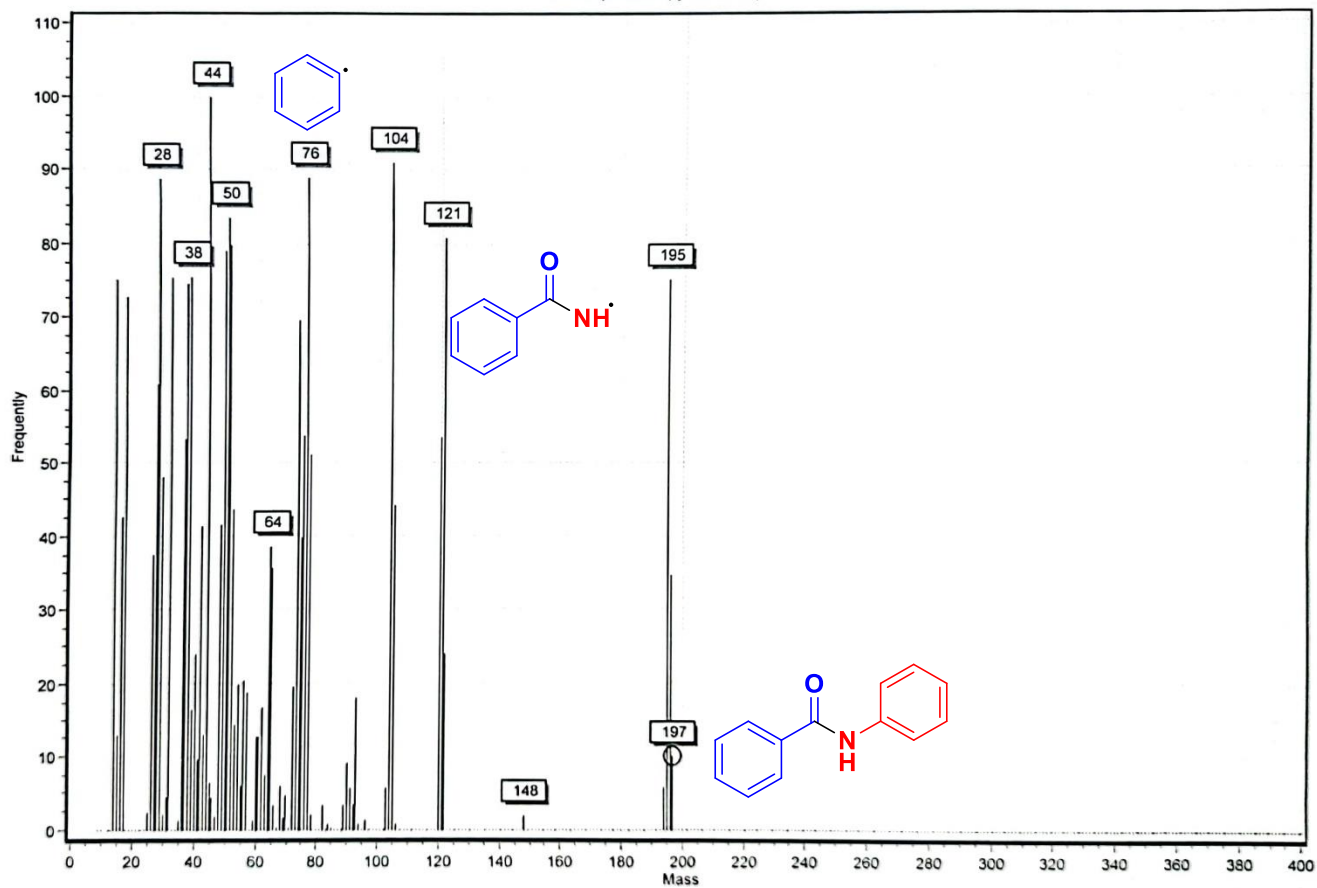

<sup>1</sup>H NMR spectrum of compound (1)

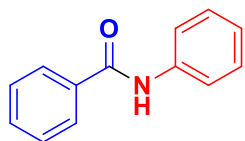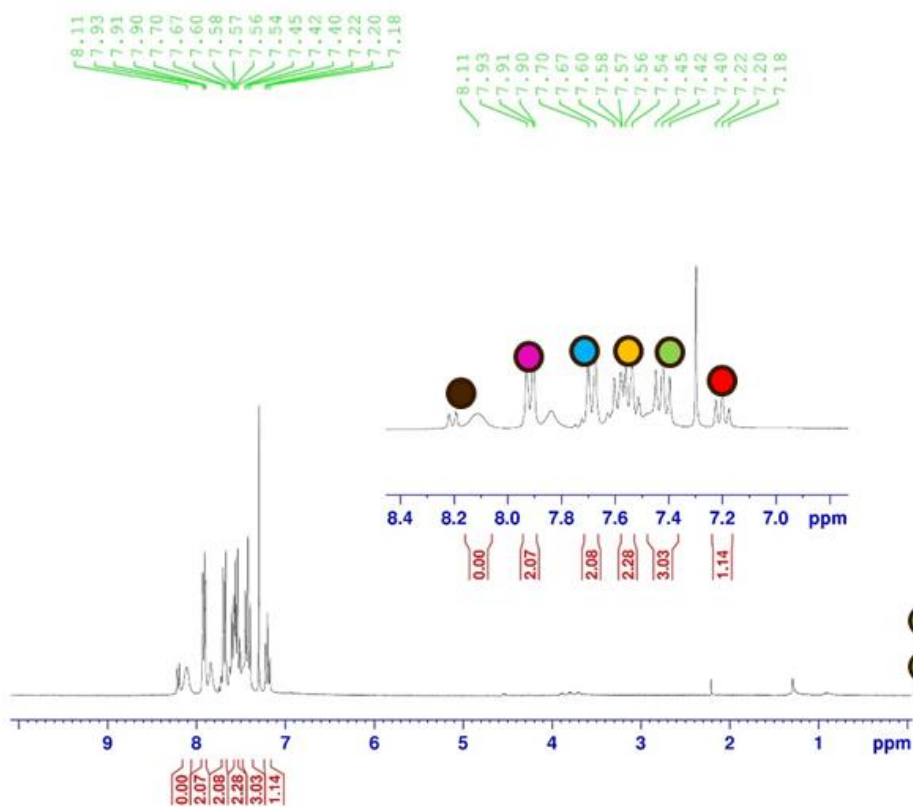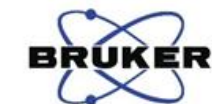

Current Data Parameters  
NAME Dey  
EXPNO 263  
PROCNO 1

F2 - Acquisition Parameters  
Date\_ 20211229  
Time 14.49  
INSTRUM spect  
PROBHD 5 mm PABBO BBO  
PULPROG zg30  
ID 65536  
SOLVENT CDCl3  
NS 128  
DS 2  
SWH 6009.615 Hz  
FIDRES 0.091699 Hz  
AQ 5.4525952 sec  
RG 202  
DW 83.200 usec  
DE 6.50 usec  
TE 295.5 K  
D1 1.00000000 sec  
TD0 1

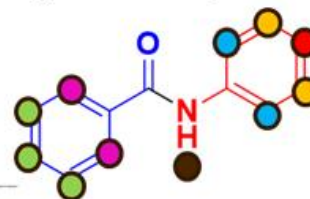

<sup>13</sup>C NMR spectrum of compound (1)

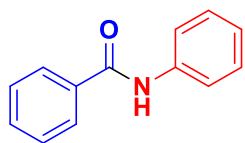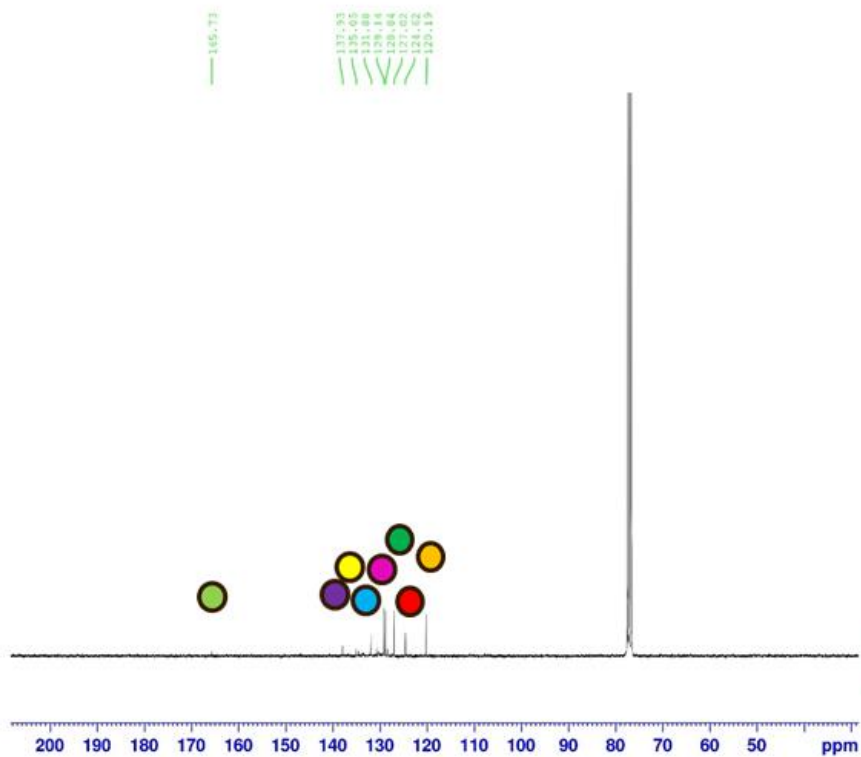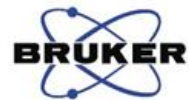

Current Data Parameters  
NAME Dr.Hadizadeh  
EXPNO 14  
PROCNO 1

F2 - Acquisition Parameters  
Date\_ 20220119  
Time 8.32  
INSTRUM spect  
PROBHD 5 mm PABBO BB-  
PULPROG zgpg30  
TD 65536  
SOLVENT CDCl3  
NS 8905  
DS 4  
SWS 18115.941 Hz  
FIDRES 0.276427 Hz  
AQ 1.6087935 sec  
RG 202  
DM 27.600 usec  
DE 6.50 usec  
TE 296.4 K  
D1 2.0000000 sec  
D11 0.03000000 sec  
TDD 1

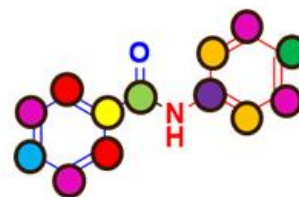

# Mass spectroscopy of compound (2)

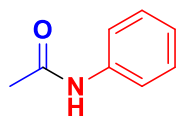

Chem. Dep., Sciences Faculty, Ferdowsi Univ., Mashhad, IRAN  
Mass Spectroscopy Laboratory

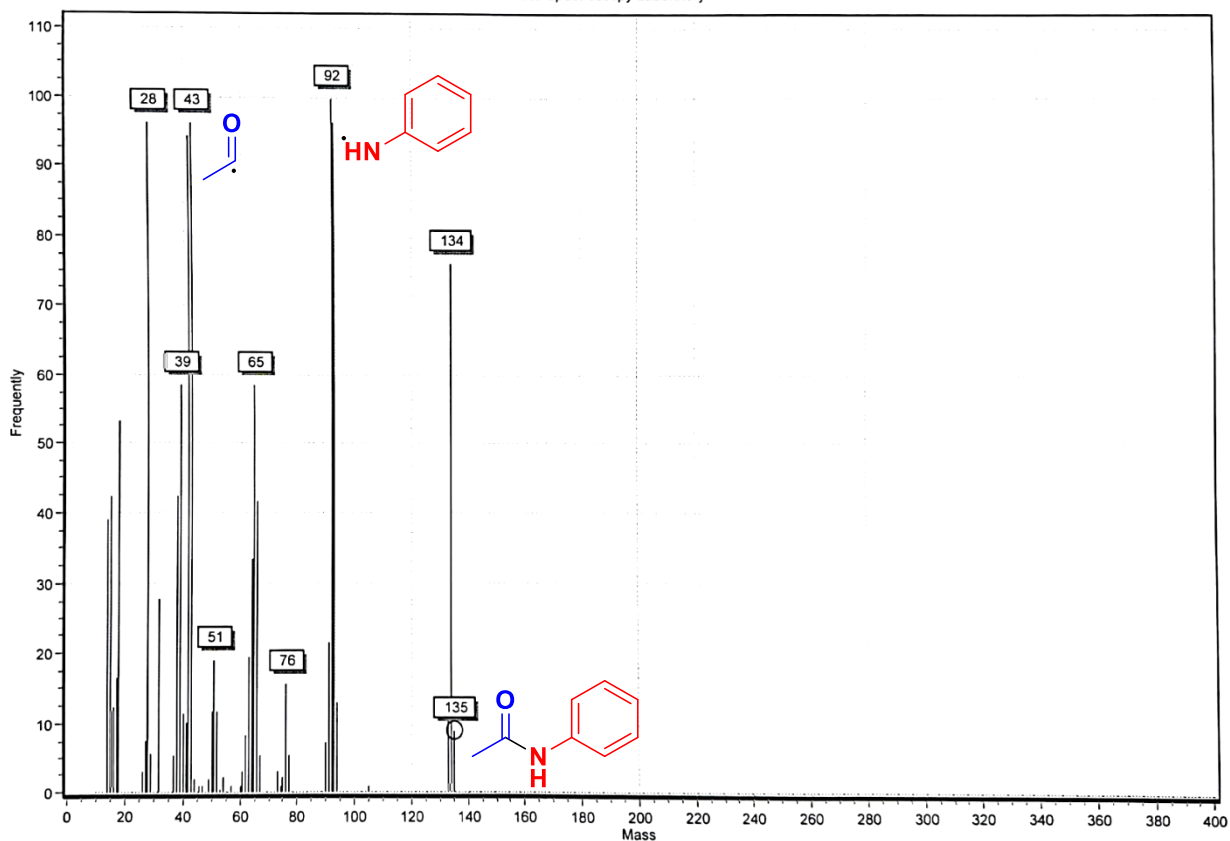

<sup>1</sup>H NMR spectrum of compound (2)

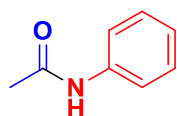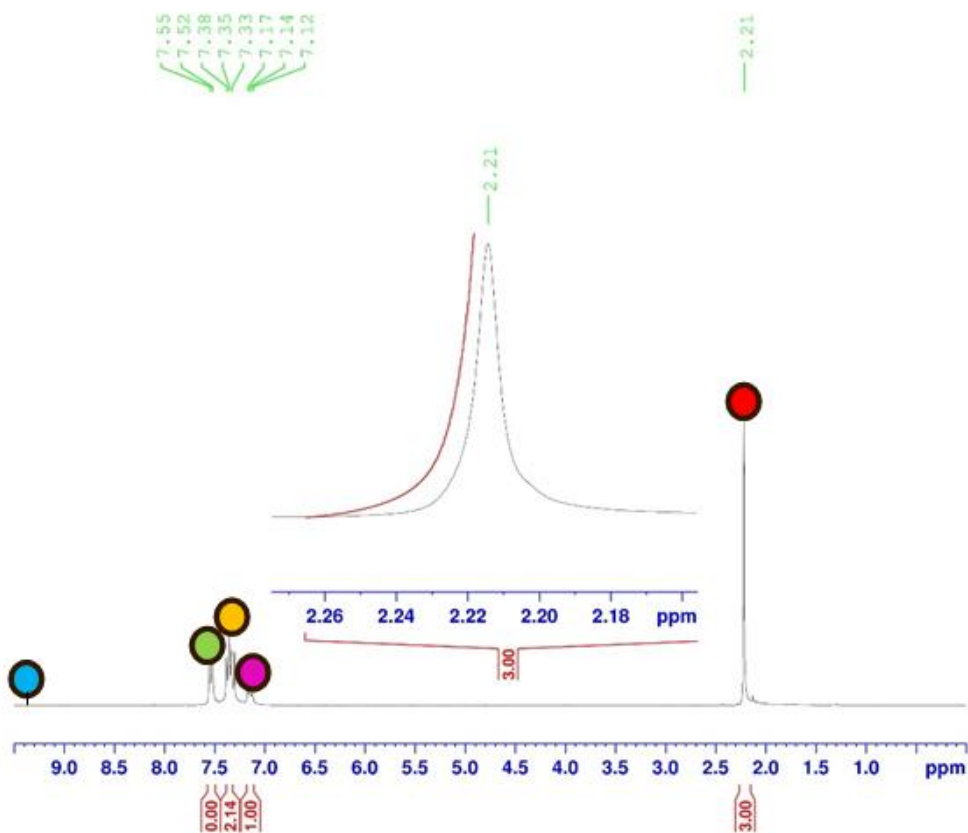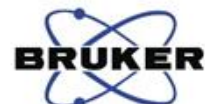

Current Data Parameters  
NAME Dey  
EXPNO 264  
PROCNO 1

F2 - Acquisition Parameters  
Date\_ 20211229  
Time 15.08  
INSTRUM spect  
PROBHD 5 mm PABBO BB-  
PULPROG zg30  
TD 65536  
SOLVENT CDCl3  
NS 32  
DS 2  
SWE 6009.615 Hz  
FIDRES 0.091699 Hz  
AQ 5.4525952 sec  
RG 202  
DW 83.200 usec  
DE 6.50 usec  
TE 295.6 K  
D1 1.00000000 sec  
TDO 1

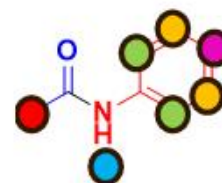

<sup>13</sup>C NMR spectrum of compound (2)

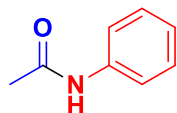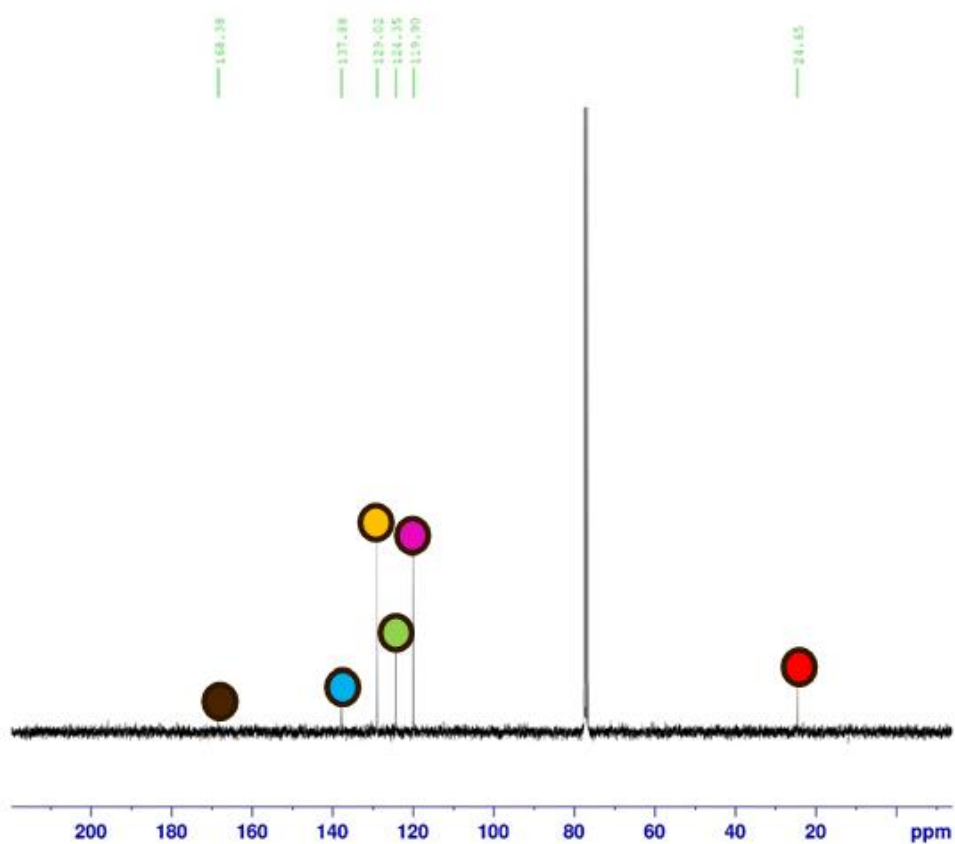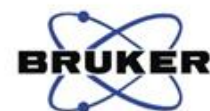

Current Data Parameters  
NAME Dey  
EXPNO 699  
PROCNO 1

F2 - Acquisition Parameters  
Date\_ 20220109  
Time 16.19  
INSTRUM spect  
PROBHD 5 mm PASSO BB-  
PULPROG zgpg30  
TD 65536  
SOLVENT CDCl3  
NS 616  
DS 4  
SWH 18115.941 Hz  
FIDRES 0.276427 Hz  
AQ 1.8087935 sec  
RG 202  
DW 27.600 usec  
DE 6.50 usec  
TE 296.0 K  
D1 2.0000000 sec  
D11 0.0300000 sec  
TDO 1

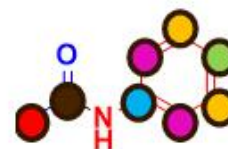

### Mass spectroscopy of compound (3)

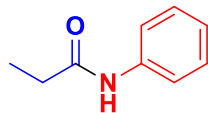

Chem. Dep., Sciences Faculty, Ferdowsi Univ., Mashhad, IRAN  
Mass Spectroscopy Laboratory

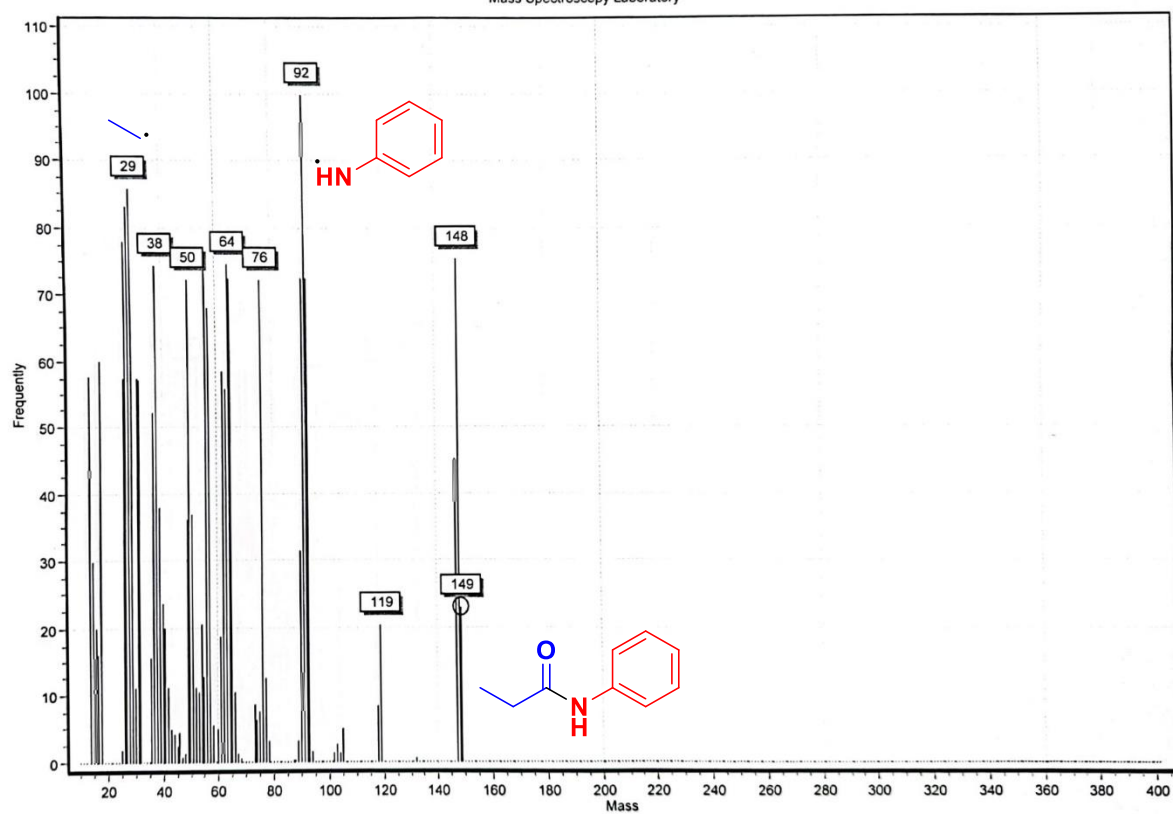

<sup>1</sup>H NMR spectrum of compound (3)

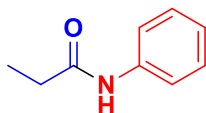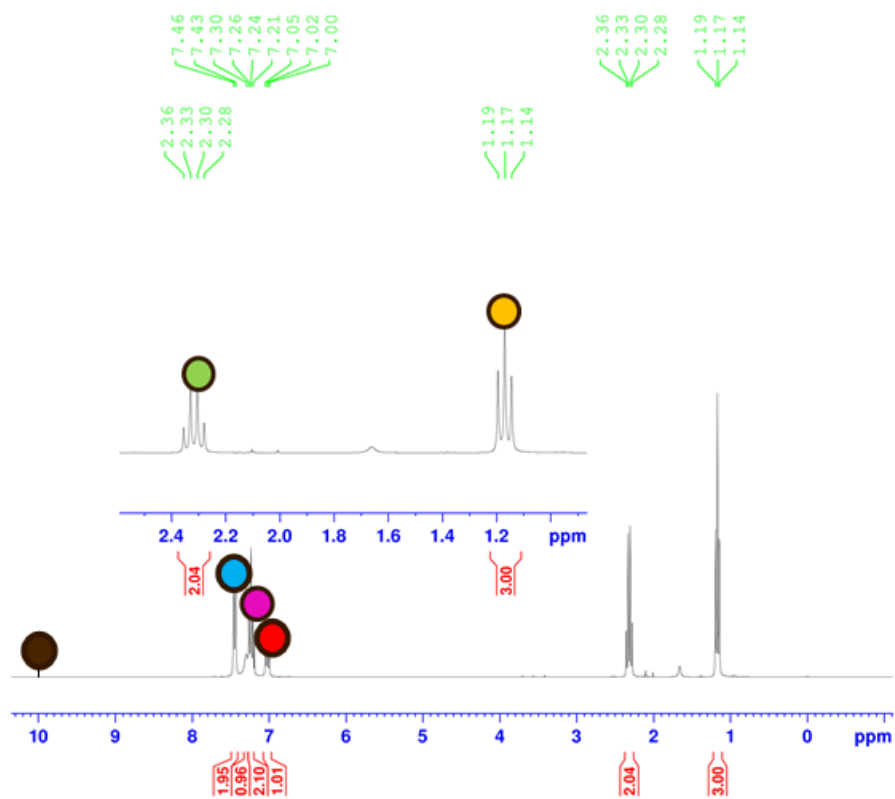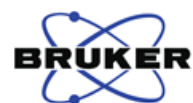

Current Data Parameters  
 NAME Bahman  
 EXPNO 531  
 PROCNO 1

F2 - Acquisition Parameters  
 Date\_ 20220208  
 Time 13.16  
 INSTRUM spect  
 PROBHD 5 mm PABBO BB-  
 PULPROG zg30  
 TD 24036  
 SOLVENT CDC13  
 NS 16  
 DS 2  
 SWH 6009.615 Hz  
 FIDRES 0.250026 Hz  
 AQ 1.9997952 sec  
 RG 158.22  
 DW 83.200 usec  
 DE 6.50 usec  
 TE 293.5 K  
 D1 1.00000000 sec  
 TDO 1

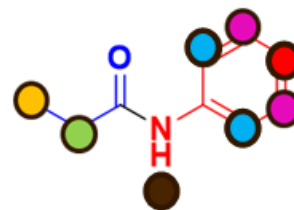

$^{13}\text{C}$  NMR spectrum of compound (3)

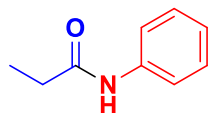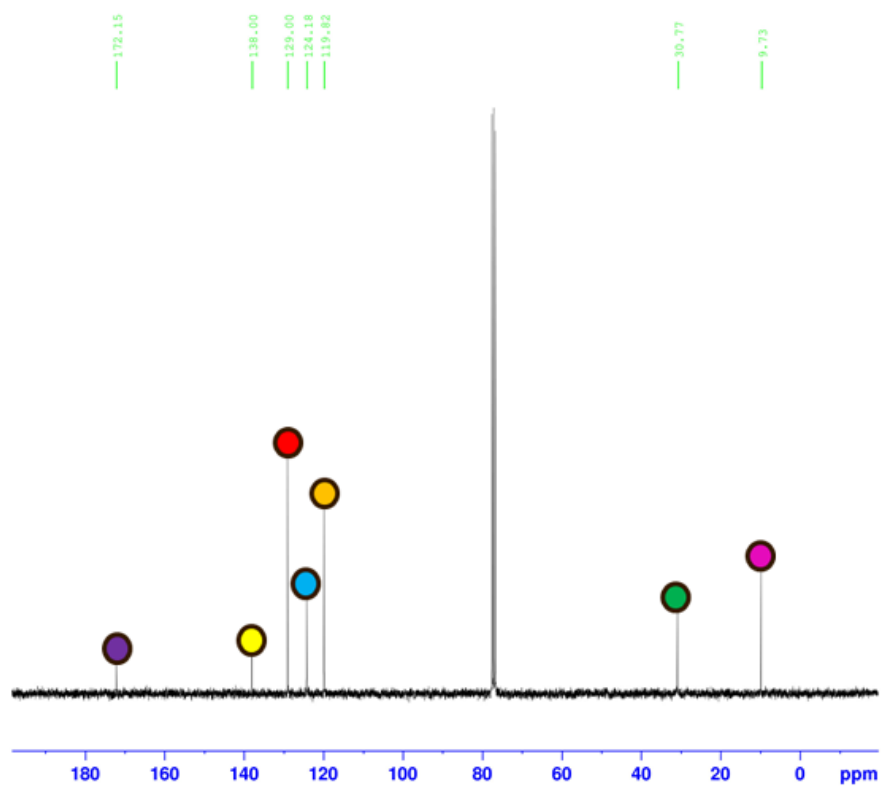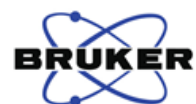

Current Data Parameters  
NAME Bahman  
EXPNO 532  
PROCNO 1

F2 - Acquisition Parameters  
Date\_ 20220208  
Time 13.42  
INSTRUM spect  
PROBHD 5 mm PABBO BB-  
PULPROG zgpg30  
TD 65536  
SOLVENT CDCl3  
NS 400  
DS 4  
SMH 18115.941 Hz  
FIDRES 0.276427 Hz  
AQ 1.8087935 sec  
RG 202  
DW 27.600 usec  
DE 6.50 usec  
TE 294.1 K  
D1 2.00000000 sec  
D11 0.03000000 sec  
TD0 1

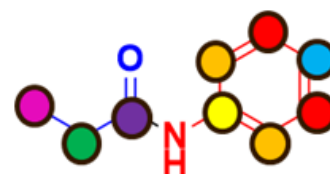

# Mass spectroscopy of compound (4)

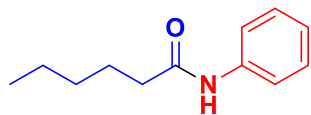

Chem. Dep., Sciences Faculty, Ferdowsi Univ., Mashhad, IRAN  
Mass Spectroscopy Laboratory

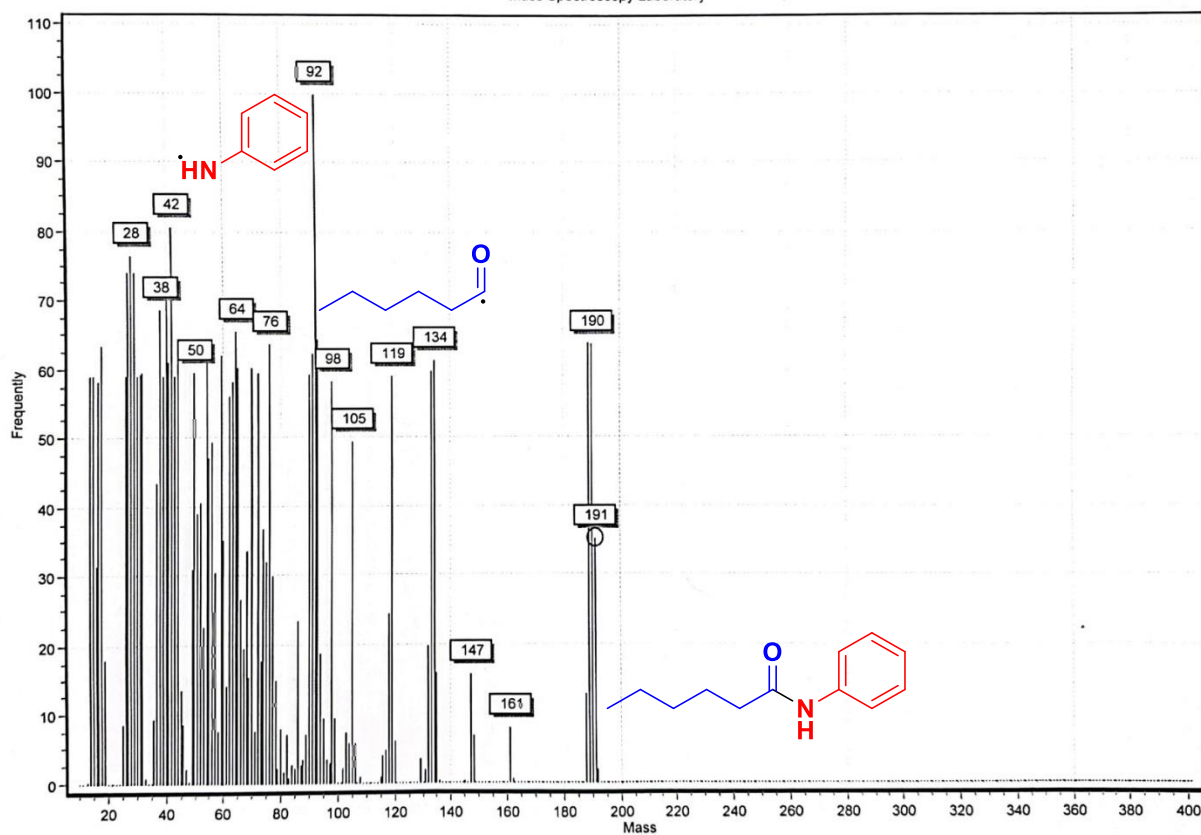

<sup>1</sup>H NMR spectrum of compound (4)

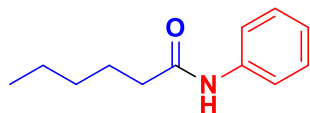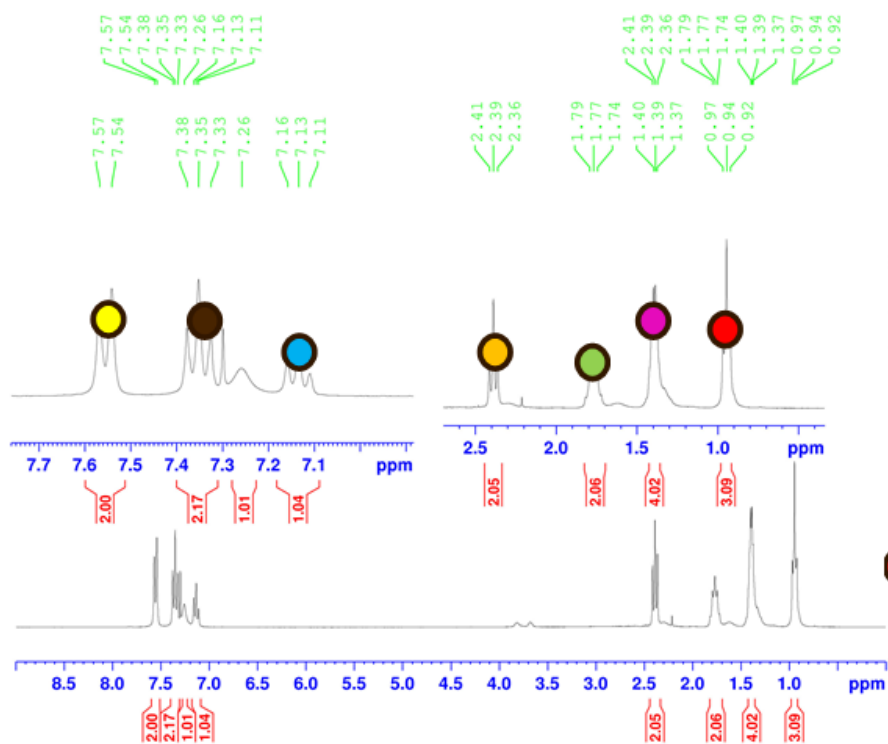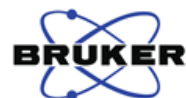

Current Data Parameters  
 NAME Bahman  
 EXPNO 534  
 PROCNO 1

F2 - Acquisition Parameters  
 Date\_ 20220208  
 Time 13.49  
 INSTRUM spect  
 PROBHD 5 mm PABBO BB-  
 PULPROG zg30  
 TD 24036  
 SOLVENT CDCl3  
 NS 32  
 DS 2  
 SWH 6009.615 Hz  
 FIDRES 0.250026 Hz  
 AQ 1.9997952 sec  
 RG 181.36  
 DW 83.200 usec  
 DE 6.50 usec  
 TE 293.5 K  
 D1 1.00000000 sec  
 TDO 1

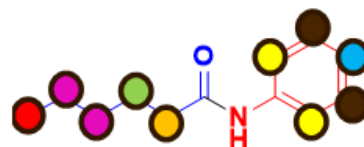

$^{13}\text{C}$  NMR spectrum of compound (4)

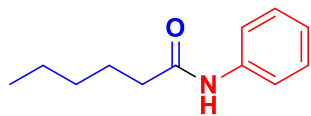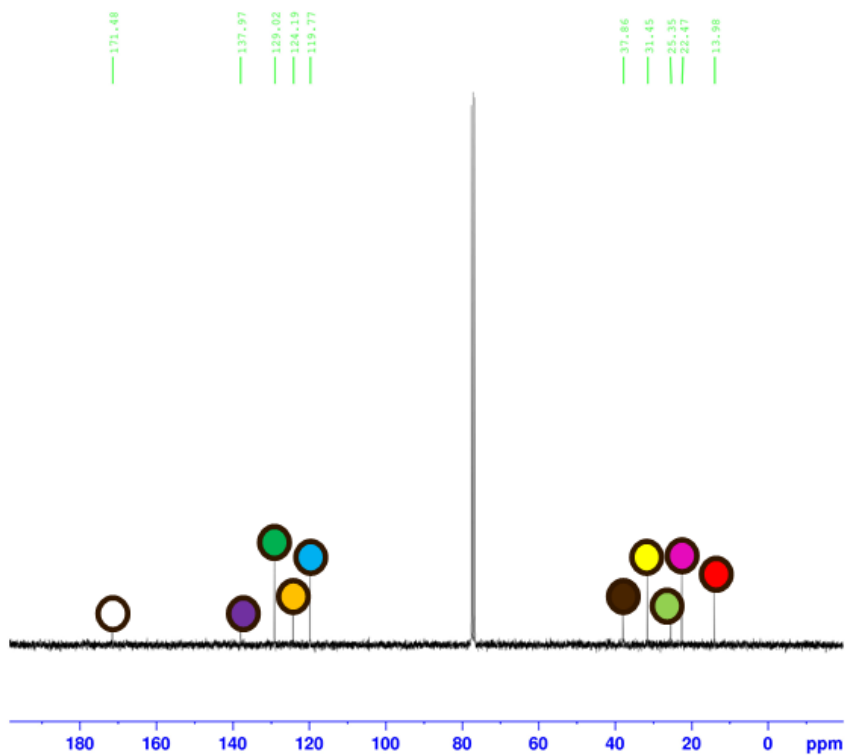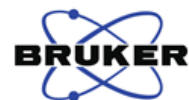

Current Data Parameters  
NAME Bahman  
EXPNO 535  
PROCNO 1

F2 - Acquisition Parameters  
Date\_ 20220208  
Time 14.18  
INSTRUM spect  
PROBHD 5 mm PABBO BB-  
PULPROG zgpg30  
TD 65536  
SOLVENT CDCl3  
NS 430  
DS 4  
SWH 1815.941 Hz  
FIDRES 0.276427 Hz  
AQ 1.8087935 sec  
RG 202  
DW 27.600 usec  
DE 6.50 usec  
TE 294.1 K  
D1 2.00000000 sec  
D11 0.03000000 sec  
TD0 1

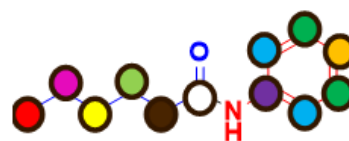

# Mass spectroscopy of compound (5)

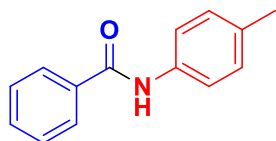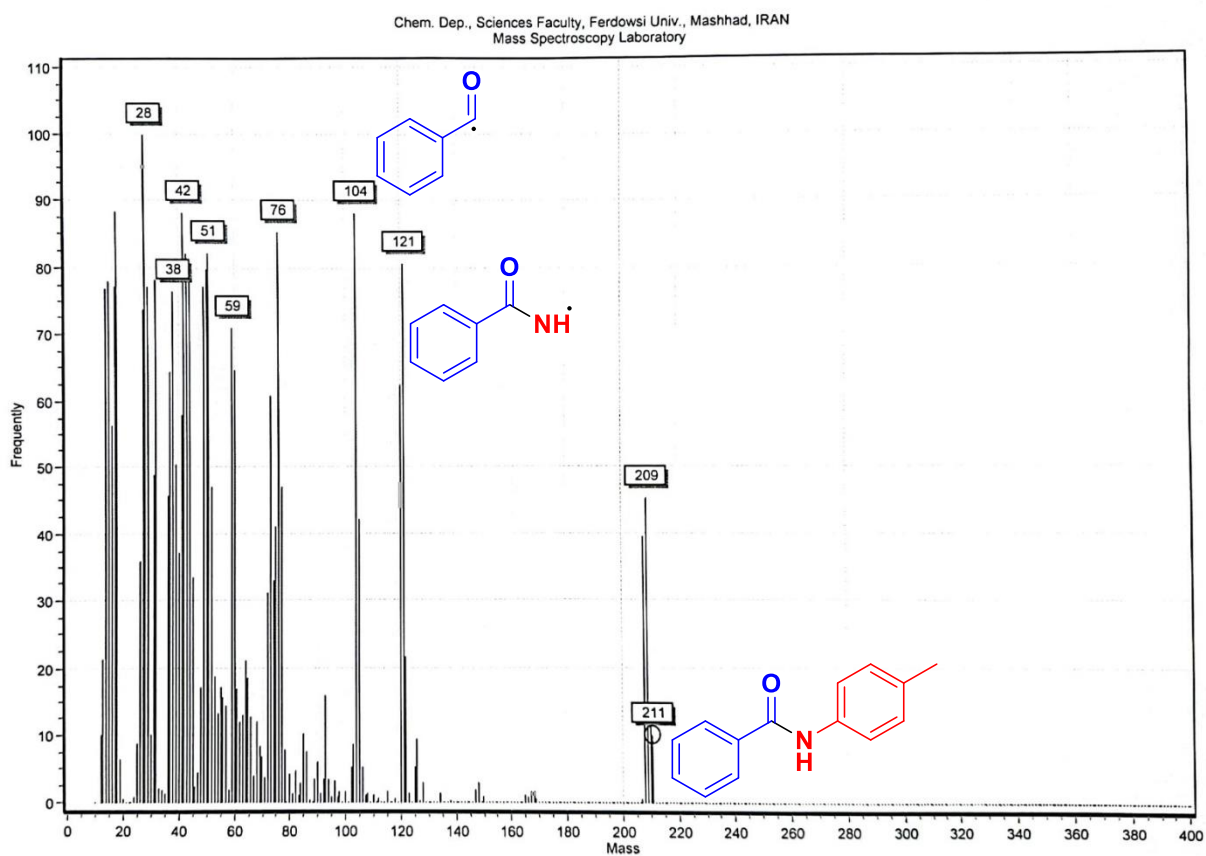

$^1\text{H}$  NMR spectrum of compound (5)

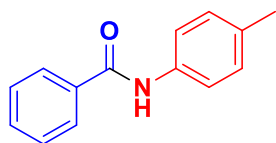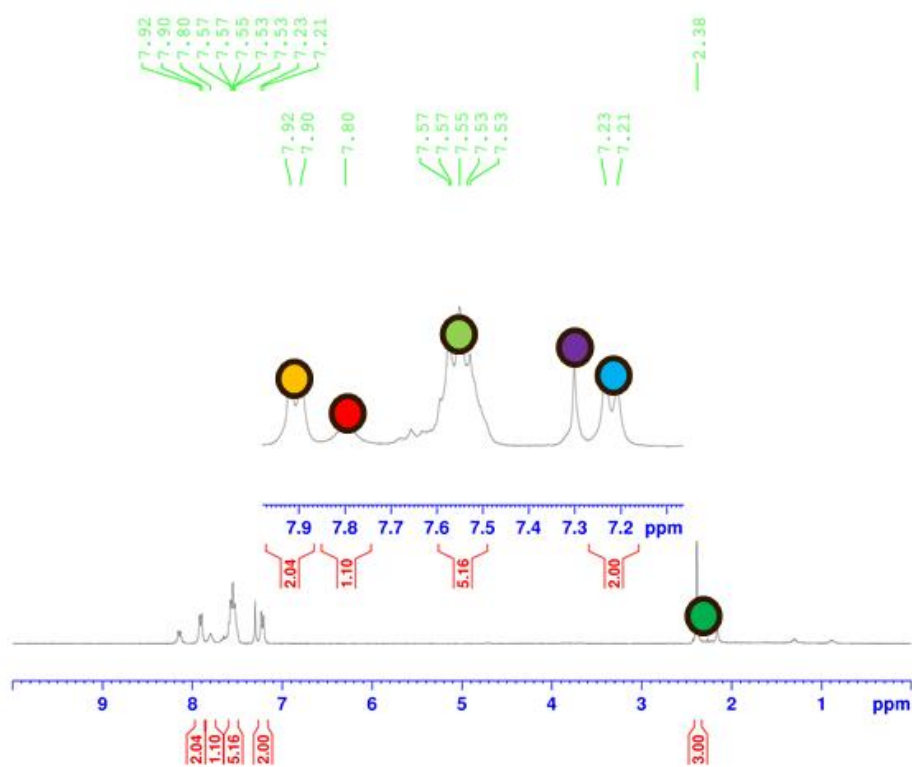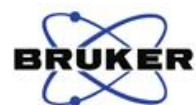

Current Data Parameters  
NAME Ordibeheht  
EXPNO 480  
PROCNO 1

F2 - Acquisition Parameters  
Date\_ 20220515  
Time 3.54  
INSTRUM spect  
PROBHD 5 mm PABBO BB-  
PULPROG zg30  
TD 65536  
SOLVENT CDCl3  
NS 16  
DS 2  
SWH 6009.615 Hz  
FIDRES 0.091699 Hz  
AQ 5.4525952 sec  
RG 202  
DW 83.200 usec  
DE 6.50 usec  
TE 295.6 K  
D1 1.00000000 sec  
TD0 1

$^{13}\text{C}$  NMR spectrum of compound (5)

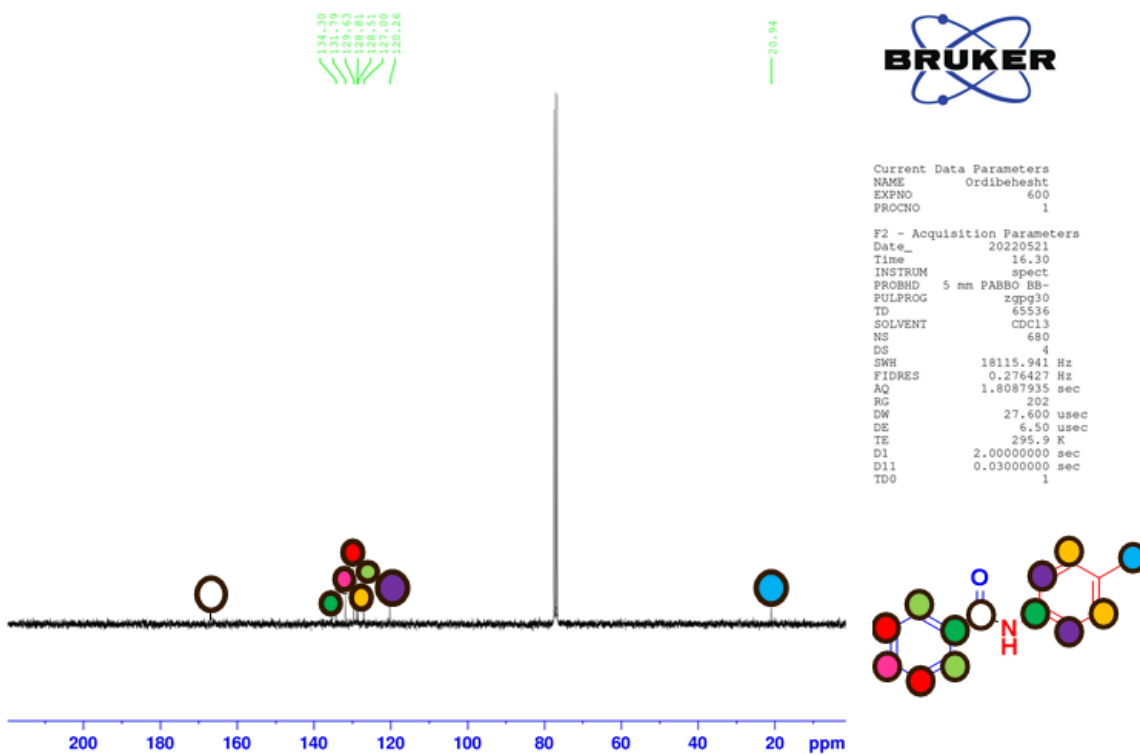

# Mass spectroscopy of compound (14)

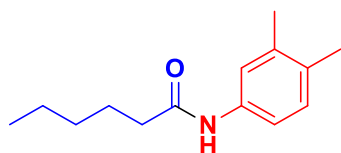

Chem. Dep., Sciences Faculty, Ferdowsi Univ., Mashhad, IRAN  
Mass Spectroscopy Laboratory

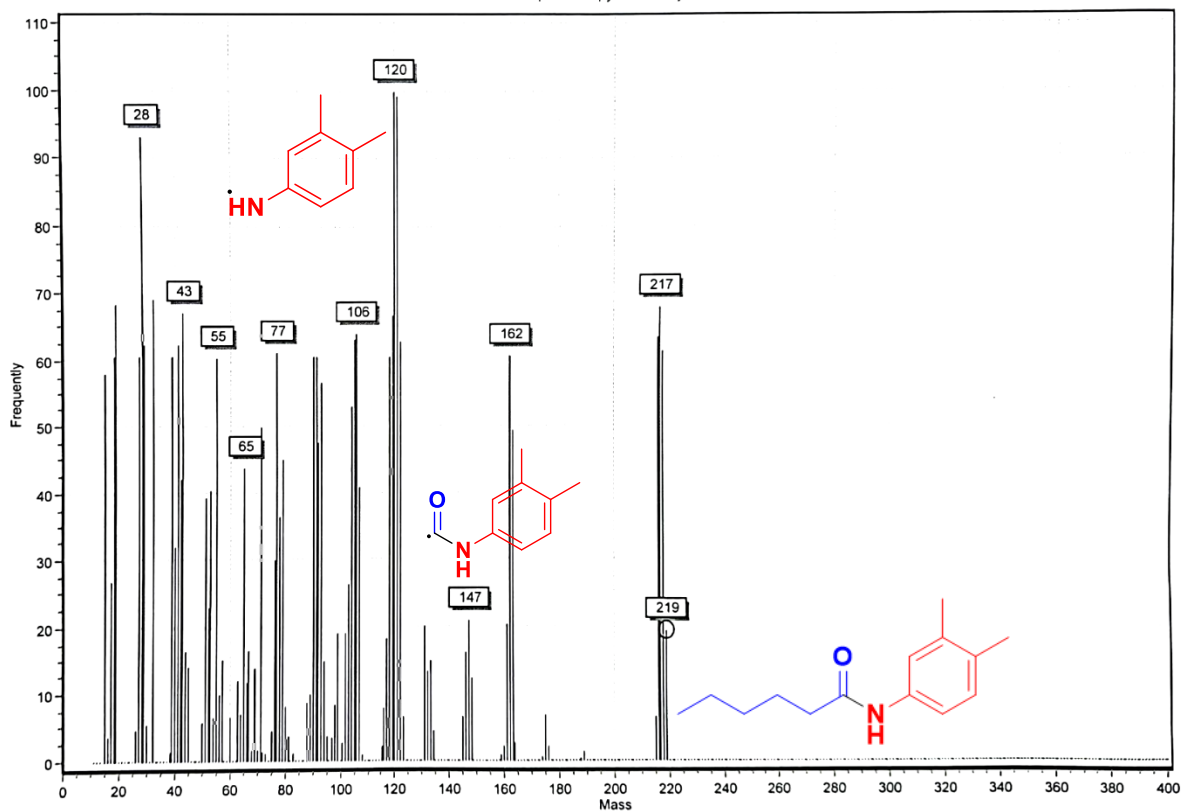

Name: fazli Sample: 24Z Date: 4/24/2022 Time: 11:21:44 AM Powered By: www.dadehabzar.com

<sup>1</sup>H NMR spectrum of compound (14)

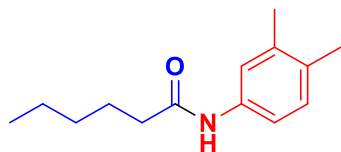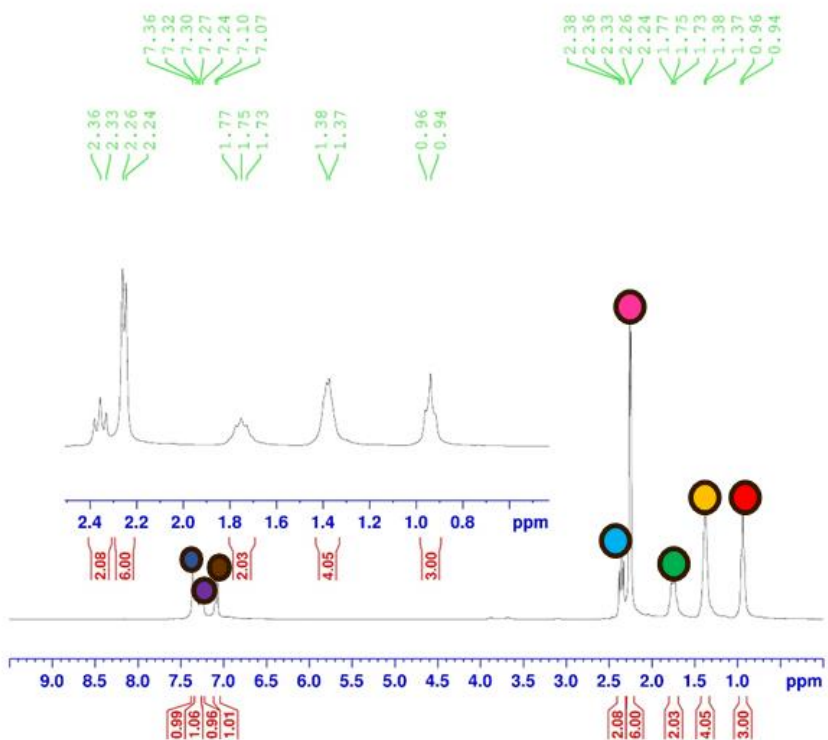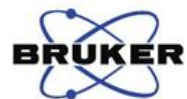

Current Data Parameters  
 NAME Ordibeheht  
 EXPNO 478  
 PROCNO 1

F2 - Acquisition Parameters  
 Date\_ 20220515  
 Time 5.15  
 INSTRUM spect  
 PROBRD 5 mm FASBO BB-  
 PULPROG zg30  
 ID 65536  
 SOLVENT CDCl3  
 NS 32  
 DS 2  
 SWH 6009.615 Hz  
 FIDRES 0.091699 Hz  
 AQ 5.4525952 sec  
 RG 113.32  
 CW 83.200 usec  
 DE 6.50 usec  
 TE 295.6 K  
 DL 1.00000000 sec  
 TDO 1

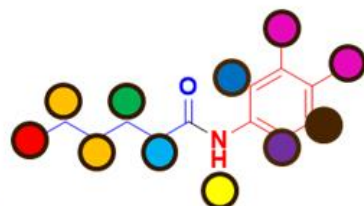

<sup>13</sup>C NMR spectrum of compound (14)

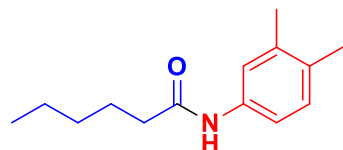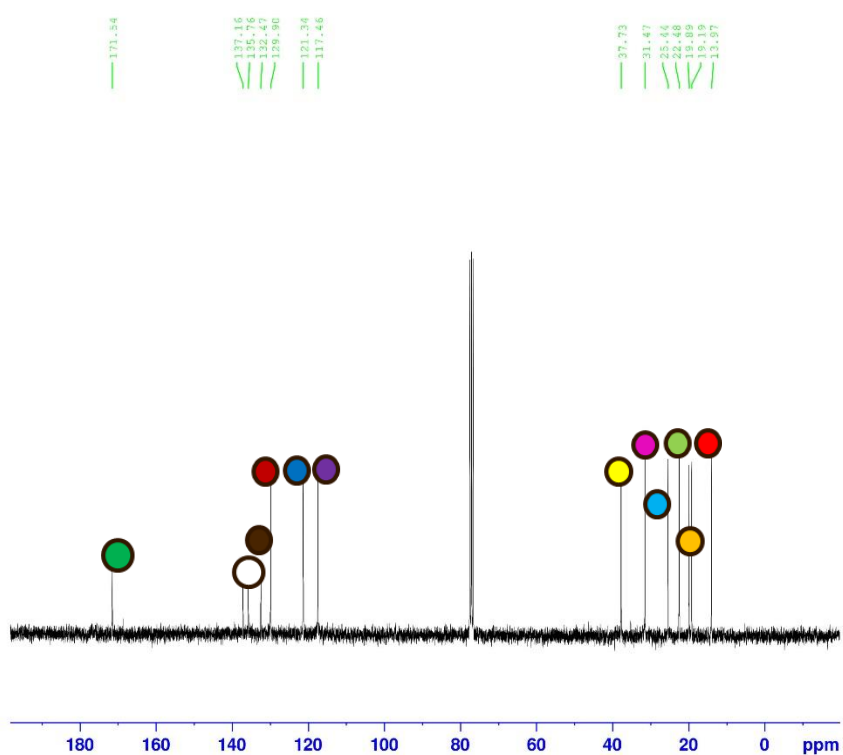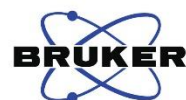

Current Data Parameters  
NAME Ordibehesht  
EXPNO 479  
PROCNO 1

F2 - Acquisition Parameters  
Date\_ 20220515  
Time 3.43  
INSTRUM spect  
PROBHD 5 mm FAPBO B3-  
PULPROG zgpg30  
TD 65536  
SOLVENT CDCl3  
NS 688  
DS 4  
SWH 18115.911 Hz  
FIDRES 0.276427 Hz  
AQ 1.8087935 sec  
RG 202  
DW 27.600 usec  
DE 6.50 usec  
TE 296.4 K  
D1 2.0000000 sec  
D11 0.0300000 sec  
TDO 1

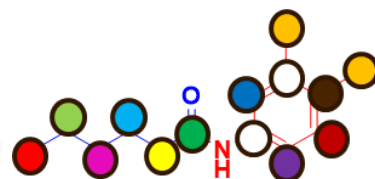

FT-IR spectrum of a blue courier related kaolin/dextrin, red courier related to kaolin/dextrin/zinc.

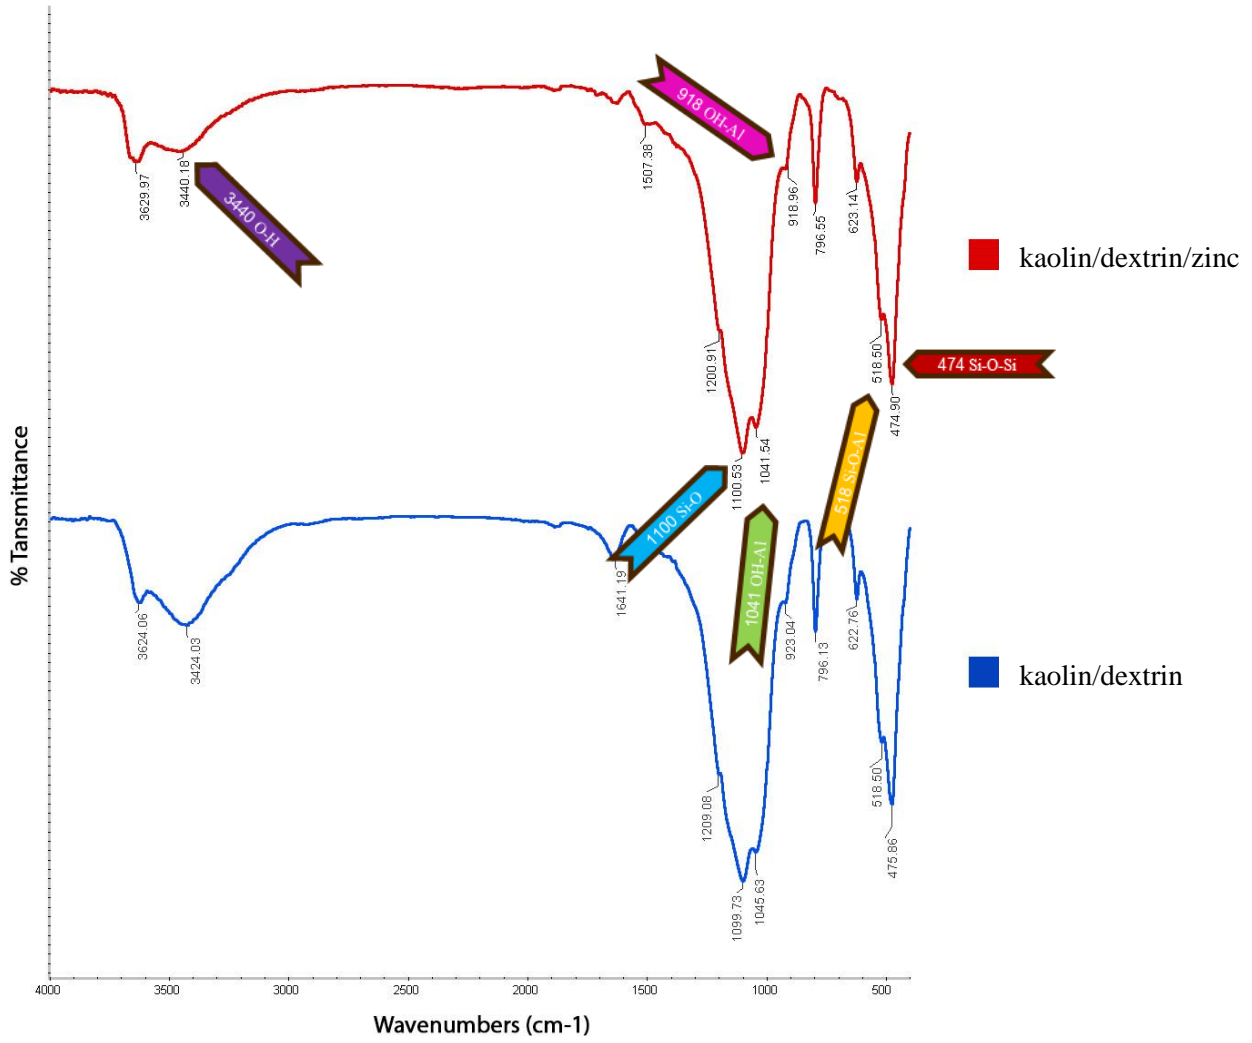

Energy-dispersive X-ray spectroscopy for kaolin/dextrin/zinc catalyst.

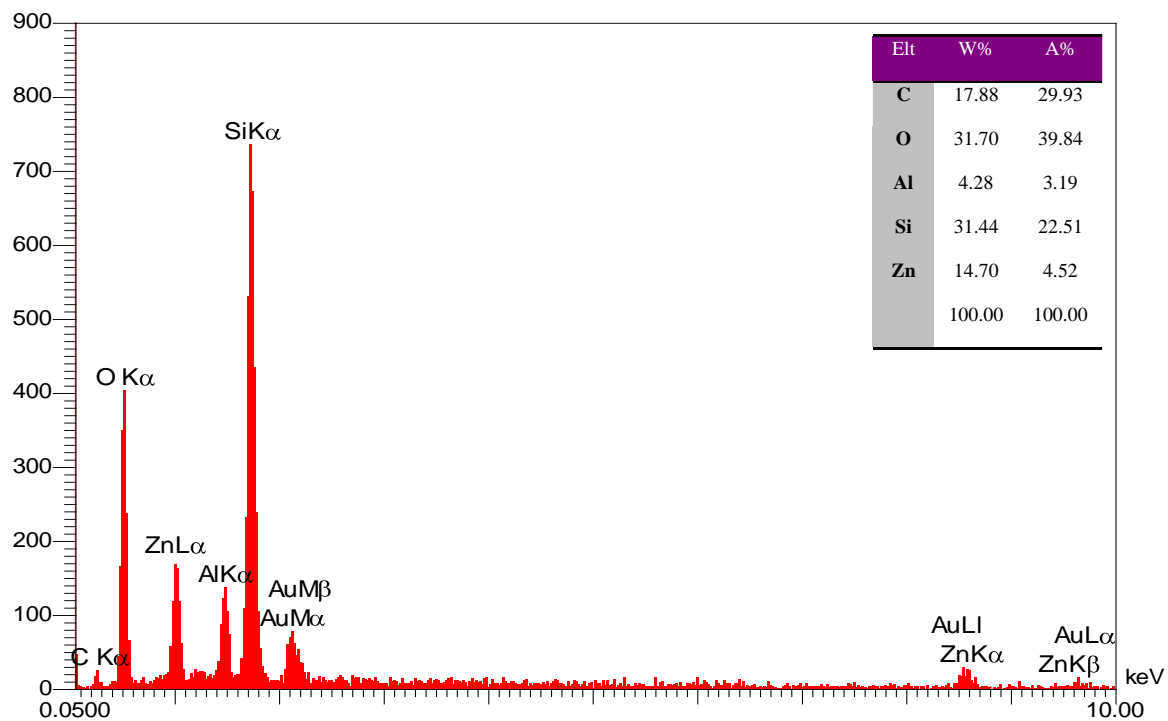

Scanning electron microscopy (SEM) for kaolin/dextrin/zinc.

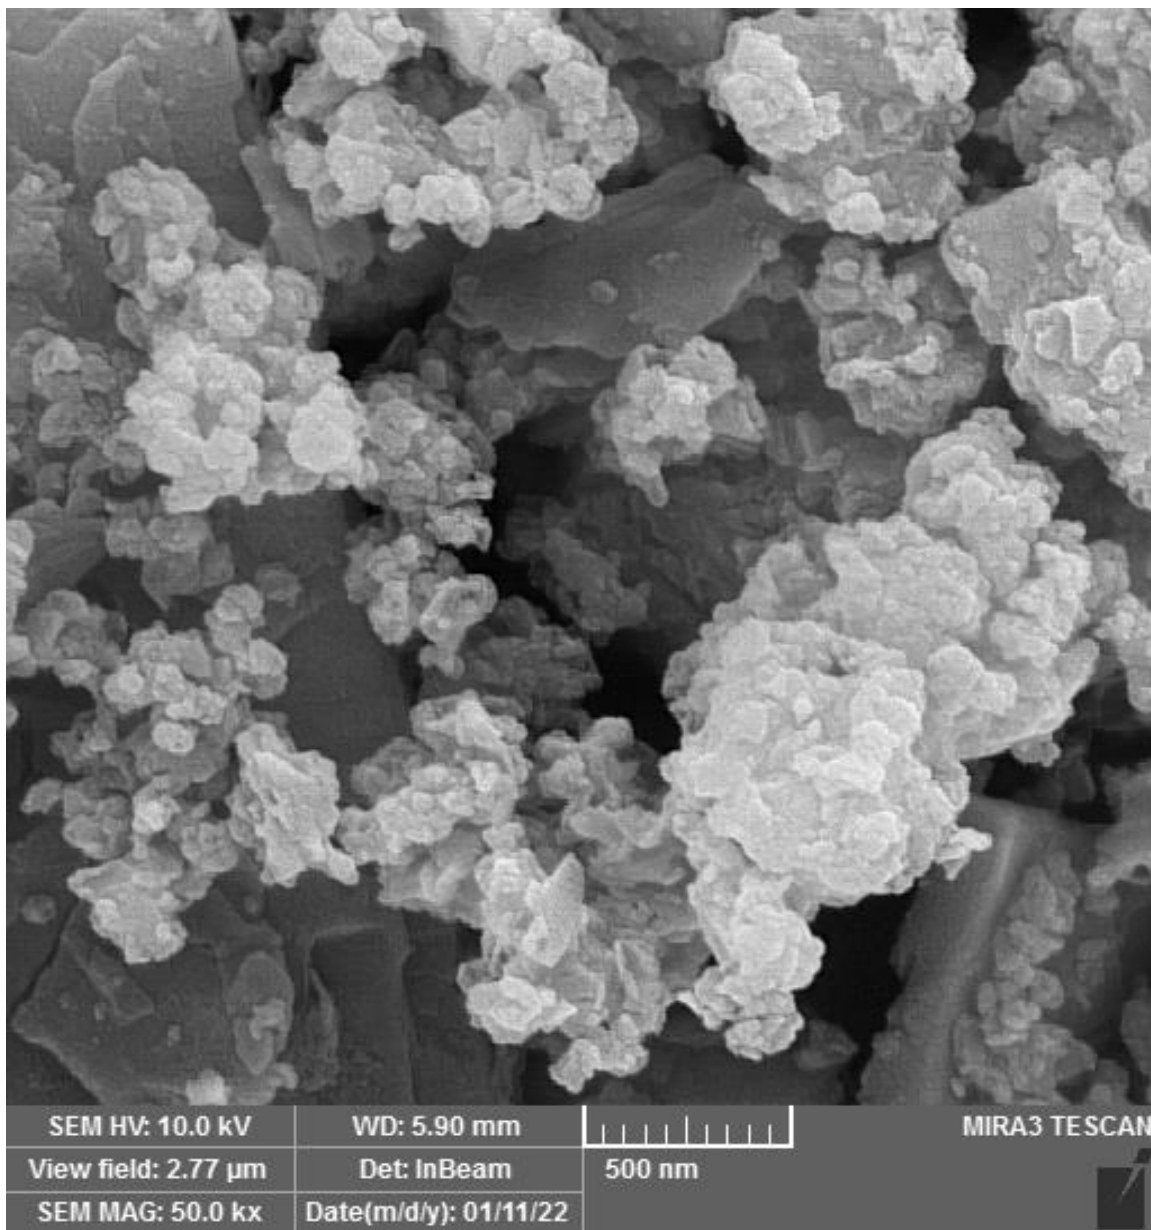

Transmission electron microscopy (TEM) for kaolin/dextrin/zinc.

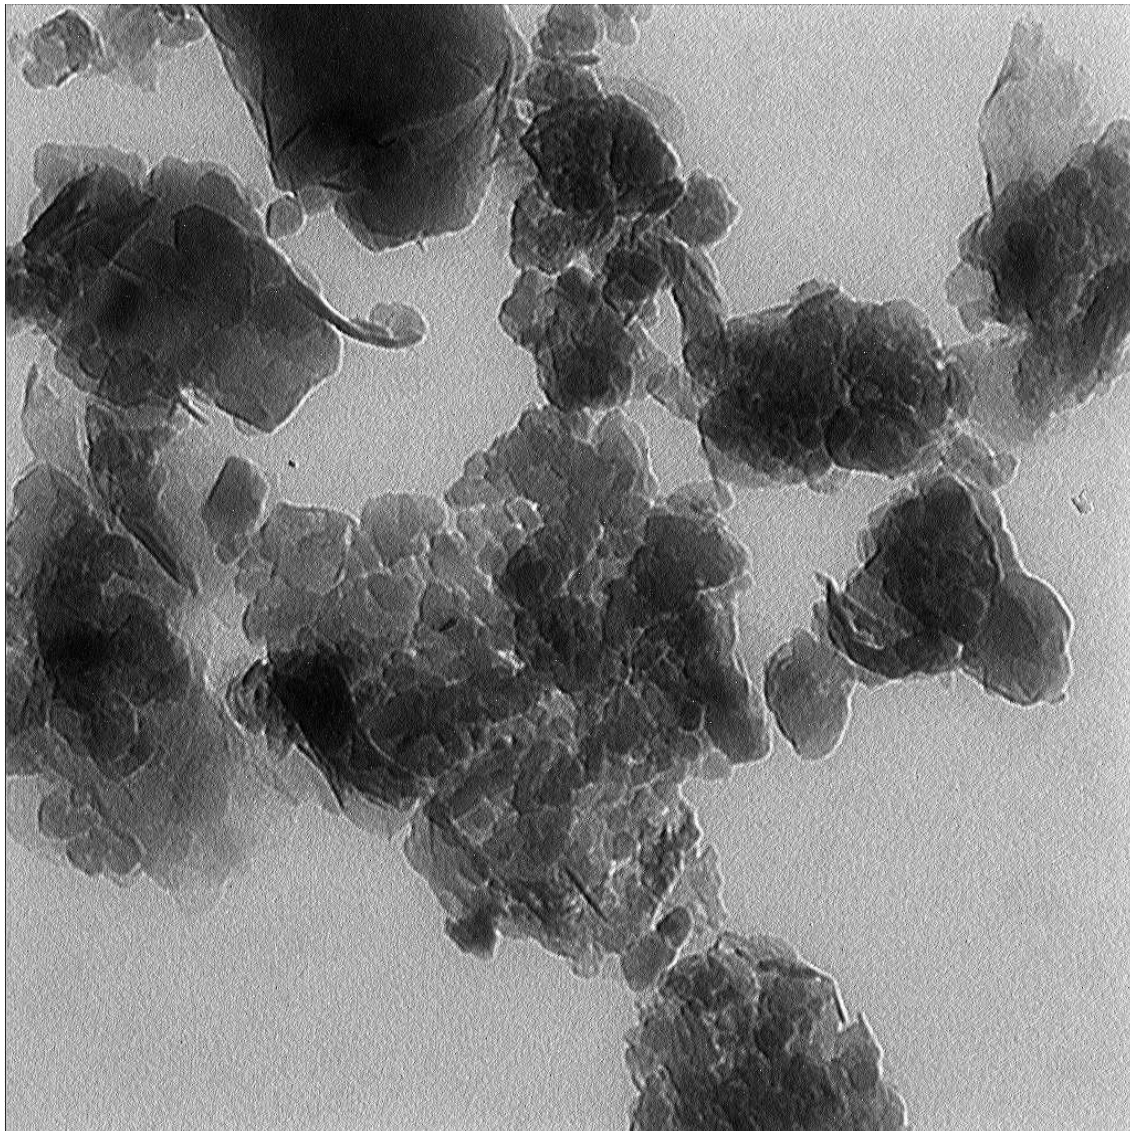

# X-ray diffraction spectroscopy for kaolin/dextrin/zinc.

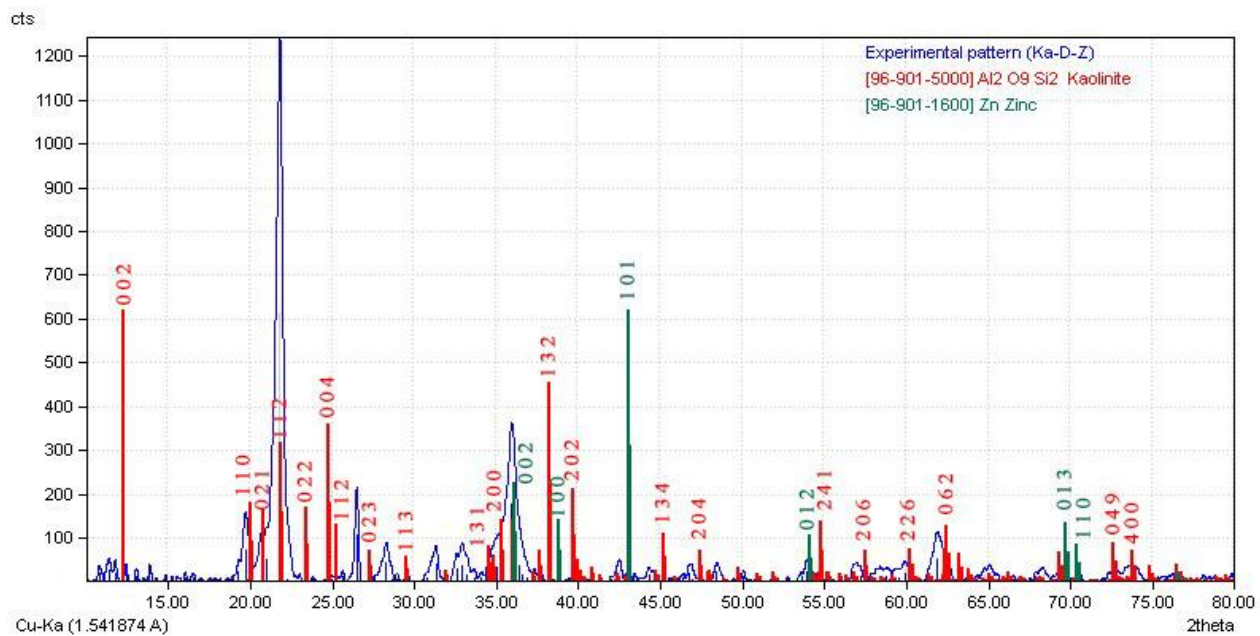

# Thermogravimetric analysis of kaolin/dextrin/zinc.

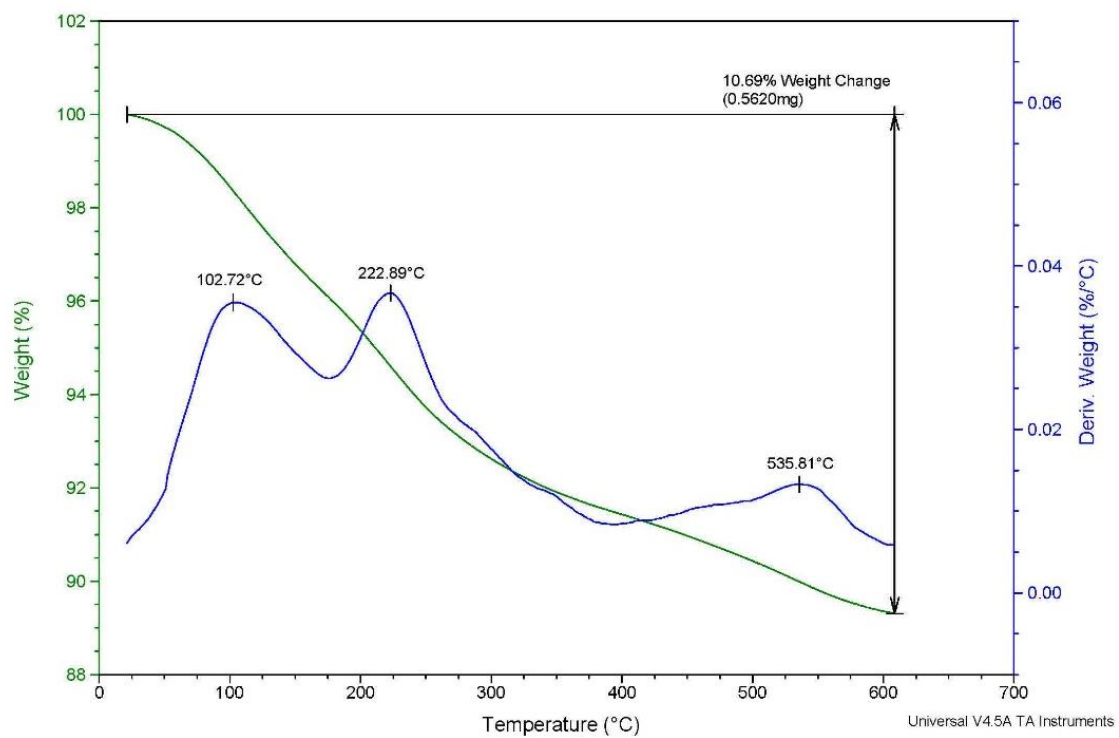

Supplement: Supplementary file 1 [file 4f10c7383618113900f2b6dc.pdf]
